# Supplementary material for: Tisagenlecleucel vs. historical standard of care in children and young adult patients with relapsed/refractory B-cell precursor acute lymphoblastic leukemia
Source: PubMed Central journal article supplement (PMC10681894; doi:10.1038/s41375-023-02042-4), 2023-10-25
Supplement: 41375_2023_2042_MOESM1_ESM.pdf [file 41375_2023_2042_MOESM1_ESM.pdf]

## Supplemental material

---

This file contains information on standardized mean differences as well as propensity score distribution before and after adjustment for relevant confounders (Full analysis set, FAS; Intention-to-treat, ITT). Baseline parameters are presented (ITT, naïve and adjusted). Median follow-up for OS, EFS and RFS are displayed along with 95% confidence intervals.

---

**Tables**

|                                                                                                             |   |
|-------------------------------------------------------------------------------------------------------------|---|
| Supplementary Table 1: Standardized mean differences by confounder, FAS                                     | 3 |
| Supplementary Table 2: Standardized mean differences by confounder, ITT                                     | 4 |
| Supplementary Table 3: Baseline parameters for tisagenlecleucel and SOC, naïve and adjusted comparison, ITT | 5 |
| Supplementary Table 4: Median follow-up for OS, EFS and RFS                                                 | 9 |

**Figures**

|                                                                                                   |    |
|---------------------------------------------------------------------------------------------------|----|
| Supplementary Figure 1: Histogram and density plot, FAS, unweighted (left) and weighted (right)   | 10 |
| Supplementary Figure 2: Histogram and density plot, ITT, unweighted (left) and weighted (right)   | 11 |
| Supplementary Figure 3: Standardized mean differences, balance plot, unweighted and weighted, FAS | 12 |
| Supplementary Figure 4: Standardized mean differences, balance plot, unweighted and weighted, ITT | 13 |

---

Supplementary Table 1: Standardized mean differences by confounder, FAS

| <b>Confounder</b>                                           | <b>Standardized mean differences (unweighted)</b> | <b>Standardized mean differences (weighted)</b> |
|-------------------------------------------------------------|---------------------------------------------------|-------------------------------------------------|
| Age at first diagnosis                                      | -0.4                                              | 0                                               |
| BCR-ABL                                                     | 0                                                 | 0.1                                             |
| Hypodiploidy                                                | 0.2                                               | 0.1                                             |
| MLL rearrangement                                           | 0                                                 | 0                                               |
| Status of disease - refractory to previous line of therapy  | -0.3                                              | 0                                               |
| Status of disease - relapsed after previous line of therapy | 0.3                                               | 0                                               |
| Baseline extramedullary disease presence                    | 0.3                                               | 0                                               |
| Previous HSCT                                               | -0.1                                              | 0                                               |
| Number of previous lines of therapies - 1                   | 0                                                 | 0                                               |
| Number of previous lines of therapies - 2                   | -0.1                                              | 0                                               |
| Number of previous lines of therapies - > 2                 | 0.1                                               | 0                                               |

FAS: Full analysis set, HSCT: Hematopoietic stem cell transplantation, MLL: Mixed-lineage leukemia

Supplementary Table 2: Standardized mean differences by confounder, ITT

| <b>Confounder</b>                                           | <b>Standardized mean differences (unweighted)</b> | <b>Standardized mean differences (weighted)</b> |
|-------------------------------------------------------------|---------------------------------------------------|-------------------------------------------------|
| Age at first diagnosis                                      | -0.3                                              | -0.1                                            |
| BCR-ABL                                                     | 0                                                 | 0                                               |
| Hypodiploidy                                                | 0.2                                               | 0.2                                             |
| MLL rearrangement                                           | 0                                                 | 0                                               |
| Status of disease - refractory to previous line of therapy  | -0.3                                              | 0                                               |
| Status of disease - relapsed after previous line of therapy | 0.3                                               | 0                                               |
| Baseline extramedullary disease presence                    | 0.3                                               | -0.1                                            |
| Previous HSCT                                               | -0.1                                              | 0                                               |
| Number of previous lines of therapies - 1                   | 0.1                                               | 0.1                                             |
| Number of previous lines of therapies - 2                   | -0.1                                              | 0                                               |
| Number of previous lines of therapies - > 2                 | 0.1                                               | 0                                               |

HSCT: Hematopoietic stem cell transplantation, ITT: Intention to treat, MLL: Mixed lineage leukemia

Supplementary Table 3: Baseline parameters for tisagenlecleucel and SOC, naïve and adjusted comparison, ITT

| Parameter                                   |                    | Tisagenlecleucel | SOC         | Tisagenlecleucel    | SOC         |
|---------------------------------------------|--------------------|------------------|-------------|---------------------|-------------|
|                                             |                    | (N=243)          | (N=302)     | (N=236)             | (N=281)     |
|                                             |                    | Naive comparison |             | Adjusted comparison |             |
| Region- n (%)                               | EU                 | 83 (34.2%)       | 301 (99.7%) | 77 (32.6%)          | 280 (99.7%) |
|                                             | US                 | 148 (60.9%)      | 1 (0.3%)    | 147 (62.3%)         | 1 (0.3%)    |
|                                             | ROW                | 12 (4.9%)        | 0 (0.0%)    | 12 (5.1%)           | 0 (0.0%)    |
|                                             |                    |                  |             |                     |             |
| Gender- n (%)                               | female             | 106 (43.6%)      | 108 (35.8%) | 104 (44.1%)         | 94 (33.4%)  |
|                                             | male               | 137 (56.4%)      | 194 (64.2%) | 132 (55.9%)         | 187 (66.6%) |
| Age at first diagnosis- (years)             | N                  | 243              | 302         | 236                 | 281         |
|                                             | Missing values     | 0                | 0           | 0                   | 0           |
|                                             | Mean               | 8                | 10          | 8                   | 9           |
|                                             | Standard deviation | 5                | 7           | 5                   | 7           |
|                                             | Median             | 7                | 9           | 7                   | 7           |
|                                             | Minimum            | 0                | 0           | 0                   | 0           |
|                                             | Maximum            | 22               | 25          | 22                  | 25          |
|                                             |                    |                  |             |                     |             |
| Age at first diagnosis (</>10 years)- n (%) | < 10 years         | 151 (62.1%)      | 167 (55.3%) | 146 (61.9%)         | 191 (67.9%) |
|                                             | ≥ 10 years         | 92 (37.9%)       | 135 (44.7%) | 90 (38.1%)          | 90 (32.1%)  |
|                                             |                    |                  |             |                     |             |
| Status of disease- n (%)                    |                    |                  |             |                     |             |

| Parameter                                           | Tisagenlecleucel<br>(N=243) | SOC<br>(N=302) | Tisagenlecleucel<br>(N=236) | SOC<br>(N=281) |
|-----------------------------------------------------|-----------------------------|----------------|-----------------------------|----------------|
|                                                     | Naive comparison            |                | Adjusted comparison         |                |
| refractory to previous line of therapy              | 49 (20.2%)                  | 96 (31.8%)     | 49 (20.8%)                  | 62 (21.9%)     |
| relapsed after previous line of therapy             | 194 (79.8%)                 | 206 (68.2%)    | 187 (79.2%)                 | 219 (78.1%)    |
| Time from initial diagnosis to first relapse- n (%) |                             |                |                             |                |
| < 18 months                                         | 54 (22.2%)                  | 64 (21.2%)     | 52 (22.0%)                  | 51 (18.1%)     |
| 18 - 36 months                                      | 84 (34.6%)                  | 66 (21.9%)     | 82 (34.7%)                  | 71 (25.4%)     |
| > 36 months                                         | 86 (35.4%)                  | 95 (31.5%)     | 84 (35.6%)                  | 97 (34.5%)     |
| n.a.                                                | 19 (7.8%)                   | 77 (25.5%)     | 18 (7.6%)                   | 62 (22.0%)     |
| Time from previous CR to relapse (days)             |                             |                |                             |                |
| N                                                   | 0                           | 176            | 0                           | 175            |
| Missing values                                      | 243                         | 126            | 236                         | 106            |
| Mean                                                | .                           | 546            | .                           | 525            |
| Standard deviation                                  | .                           | 385            | .                           | 406            |
| Median                                              | .                           | 427            | .                           | 364            |
| Minimum                                             | .                           | 36             | .                           | 36             |
| Maximum                                             | .                           | 1806           | .                           | 1806           |
| Previous HSCT- n (%)                                |                             |                |                             |                |
| No                                                  | 110 (45.3%)                 | 123 (40.7%)    | 105 (44.5%)                 | 129 (45.7%)    |

| Parameter                                    | Tisagenlecleucel<br>(N=243) | SOC<br>(N=302) | Tisagenlecleucel<br>(N=236) | SOC<br>(N=281) |
|----------------------------------------------|-----------------------------|----------------|-----------------------------|----------------|
|                                              | Naive comparison            |                | Adjusted comparison         |                |
| Yes                                          | 133 (54.7%)                 | 179 (59.3%)    | 131 (55.5%)                 | 152 (54.3%)    |
| Number of previous lines of therapies- n (%) |                             |                |                             |                |
| 1                                            | 24 (9.9%)                   | 24 (7.9%)      | 21 (8.9%)                   | 21 (7.4%)      |
| 2                                            | 86 (35.4%)                  | 127 (42.1%)    | 85 (36.0%)                  | 101 (36.0%)    |
| > 2                                          | 133 (54.7%)                 | 151 (50.0%)    | 130 (55.1%)                 | 159 (56.6%)    |
| Number of previous relapses- n (%)           |                             |                |                             |                |
| 0                                            | 0 (0.0%)                    | 24 (7.9%)      | 0 (0.0%)                    | 21 (7.4%)      |
| 1                                            | 0 (0.0%)                    | 99 (32.8%)     | 0 (0.0%)                    | 57 (20.4%)     |
| 2                                            | 0 (0.0%)                    | 131 (43.4%)    | 0 (0.0%)                    | 135 (48.2%)    |
| ≥3                                           | 0 (0.0%)                    | 48 (15.9%)     | 0 (0.0%)                    | 67 (24.0%)     |
| n.a.                                         | 243 (100.0%)                | 0 (0.0%)       | 236 (100.0%)                | 0 (0.0%)       |
| Morphologic blast count in BM- n (%)         |                             |                |                             |                |
| Low (<50%)                                   | 74 (30.5%)                  | 74 (24.5%)     | 72 (30.5%)                  | 71 (25.1%)     |
| High (≥50%)                                  | 166 (68.3%)                 | 72 (23.8%)     | 161 (68.2%)                 | 78 (27.8%)     |
| n.a.                                         | 3 (1.2%)                    | 156 (51.7%)    | 3 (1.3%)                    | 132 (47.1%)    |
| Hypodiploidy- n (%)                          |                             |                |                             |                |
| No or n.a.                                   | 237 (97.5%)                 | 301 (99.7%)    | 233 (98.7%)                 | 281 (100.0%)   |
| Yes                                          | 6 (2.5%)                    | 1 (0.3%)       | 3 (1.3%)                    | 0 (0.0%)       |
| BCR-ABL- n (%)                               |                             |                |                             |                |
| negative or n.a.                             | 234 (96.3%)                 | 289 (95.7%)    | 228 (96.6%)                 | 274 (97.4%)    |
| positive                                     | 9 (3.7%)                    | 13 (4.3%)      | 8 (3.4%)                    | 7 (2.6%)       |

| Parameter                                       | Tisagenlecleucel<br>(N=243) | SOC<br>(N=302) | Tisagenlecleucel<br>(N=236) | SOC<br>(N=281) |             |
|-------------------------------------------------|-----------------------------|----------------|-----------------------------|----------------|-------------|
|                                                 | Naive comparison            |                | Adjusted comparison         |                |             |
| MLL rearrangement- n (%)                        | No or n.a.                  | 237 (97.5%)    | 293 (97.0%)                 | 230 (97.5%)    | 271 (96.6%) |
|                                                 | Yes                         | 6 (2.5%)       | 9 (3.0%)                    | 6 (2.5%)       | 10 (3.4%)   |
| Baseline extramedullary disease presence- n (%) | No or n.a.                  | 215 (88.5%)    | 292 (96.7%)                 | 212 (89.8%)    | 247 (87.9%) |
|                                                 | Yes                         | 28 (11.5%)     | 10 (3.3%)                   | 24 (10.2%)     | 34 (12.1%)  |
| Karnofsky-Index- n (%)                          | 20                          | 0 (0.0%)       | 1 (0.3%)                    | 0 (0.0%)       | 1 (0.4%)    |
|                                                 | 40                          | 0 (0.0%)       | 3 (1.0%)                    | 0 (0.0%)       | 3 (1.0%)    |
|                                                 | 50                          | 5 (2.1%)       | 5 (1.7%)                    | 5 (2.1%)       | 4 (1.5%)    |
|                                                 | 60                          | 9 (3.7%)       | 7 (2.3%)                    | 7 (3.0%)       | 11 (4.0%)   |
|                                                 | 70                          | 16 (6.6%)      | 11 (3.6%)                   | 16 (6.8%)      | 17 (6.1%)   |
|                                                 | 80                          | 36 (14.8%)     | 22 (7.3%)                   | 35 (14.8%)     | 25 (9.0%)   |
|                                                 | 90                          | 70 (28.8%)     | 16 (5.3%)                   | 70 (29.7%)     | 15 (5.3%)   |
|                                                 | 100                         | 73 (30.0%)     | 21 (7.0%)                   | 70 (29.7%)     | 20 (7.2%)   |
|                                                 | n.a.                        | 34 (14.0%)     | 216 (71.5%)                 | 33 (14.0%)     | 184 (65.6%) |

BM: Bone marrow, CR: Complete remission, EU: European union, HSCT: Hematopoietic stem cell transplantation, ITT: Intention to treat, MLL: Mixed-lineage leukemia, n.a: not available, ROW: Rest-of-the-world, SOC: Standard of care, US: United States

The adjusted values refer to the weighted populations using fine stratification weights after trimming of patients in non-overlapping regions of the propensity score distribution.

Unless otherwise specified, parameters are evaluated for tisagenlecleucel population (ELIANA, ENSIGN incl. LTFU, CCTLO19B2001X incl. LTFU) at the screening time and at the time of the qualifying event for the external control. The qualifying events were defined as follows: primary refractory or chemorefractory after relapse, 2<sup>nd</sup> or greater BM or any BM relapse after allogeneic HSCT.



Supplementary Table 4: Median follow-up for OS, EFS and RFS

| Median follow-up (in months) (95%CI) |                     |                      |                     |                     |
|--------------------------------------|---------------------|----------------------|---------------------|---------------------|
| FAS                                  |                     |                      |                     |                     |
|                                      | Naïve comparison    |                      | Adjusted comparison |                     |
|                                      | Tisagenlecleucel    | SOC                  | Tisagenlecleucel    | SOC                 |
| OS                                   | 30.19 (27.30–33.08) | 59.39 (48.24–70.88)  | 30.19 (28.06–34.91) | 60.51 (48.24–75.31) |
| EFS                                  | 21.20 (12.40–23.66) | 69.86 (48.93–92.90)  | n.a.                | n.a.                |
| RFS                                  | 13.72 (11.26–21.39) | 73.73 (59.13–102.15) | n.a.                | n.a.                |
| ITT                                  |                     |                      |                     |                     |
|                                      | Naïve comparison    |                      | Adjusted comparison |                     |
|                                      | Tisagenlecleucel    | SOC                  | Tisagenlecleucel    | SOC                 |
| OS                                   | 21.79 (17.00–26.64) | 59.39 (48.24–70.88)  | 22.51 (18.01–29.11) | 60.51 (41.05–70.88) |

EFS: Event-free survival, FAS: Full analysis set, ITT: Intention-to-treat, n.a.: not available, OS: Overall survival, RFS: Relapse-free survival

Median follow-up was calculated according to reverse KM method.

Supplementary Figure 1: Histogram and density plot, FAS, unweighted (left) and weighted (right)

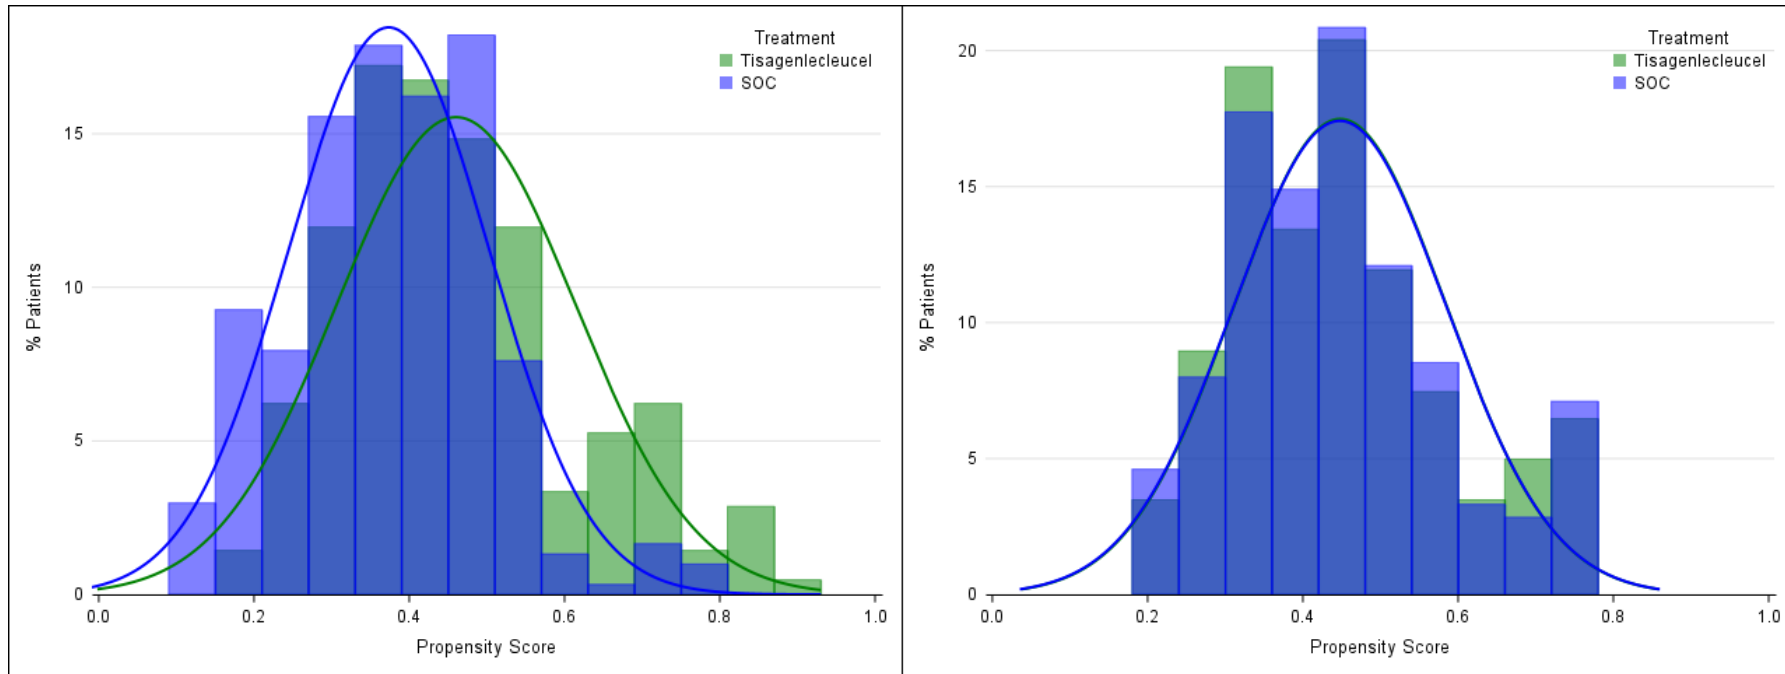

FAS: Full analysis set, PS: Propensity score, SOC: Standard of care

Supplementary Figure 2: Histogram and density plot, ITT, unweighted (left) and weighted (right)

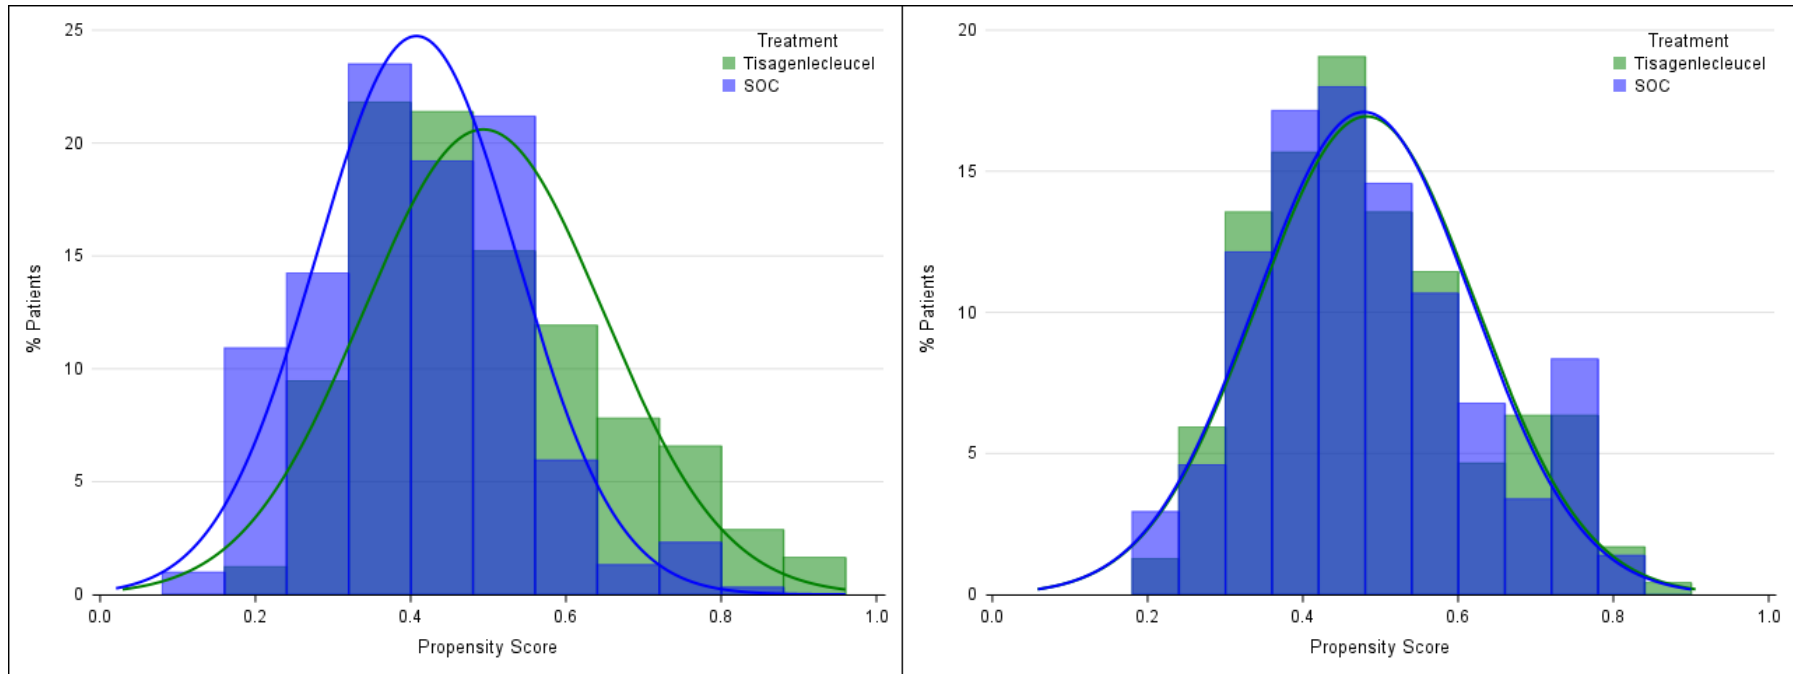

ITT: Intention to treat, PS: Propensity score, SOC: Standard of care

Supplementary Figure 3: Standardized mean differences, balance plot, unweighted and weighted, FAS

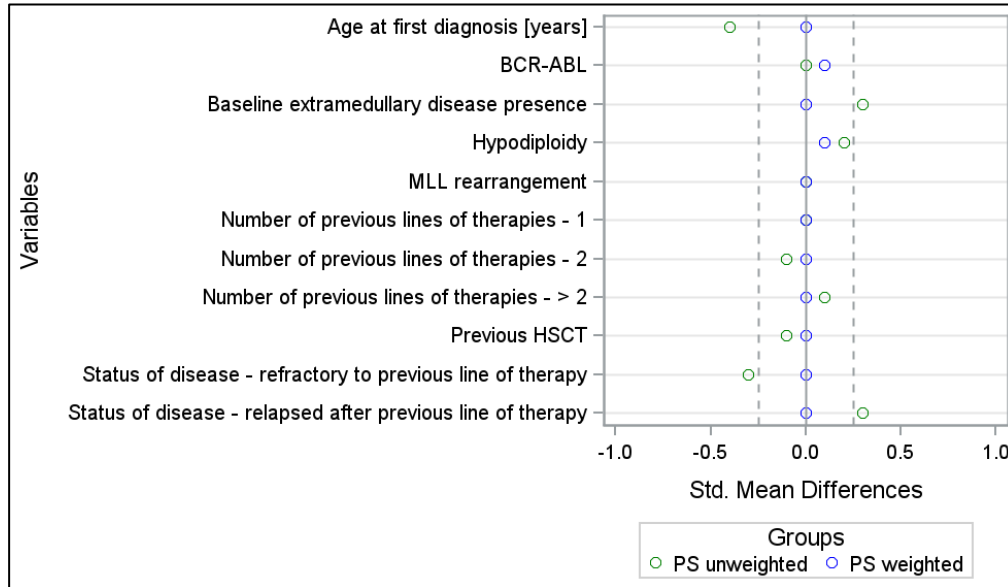

FAS: Full analysis set, HSCT: Hematopoietic stem cell transplantation, MLL: Mixed-lineage leukemia, PS: Propensity Score

Note: Using a threshold of ISMDI  $\leq 0.25$  to identify imbalance in the calculated standardized mean differences

Supplementary Figure 4: Standardized mean differences, balance plot, unweighted and weighted, ITT

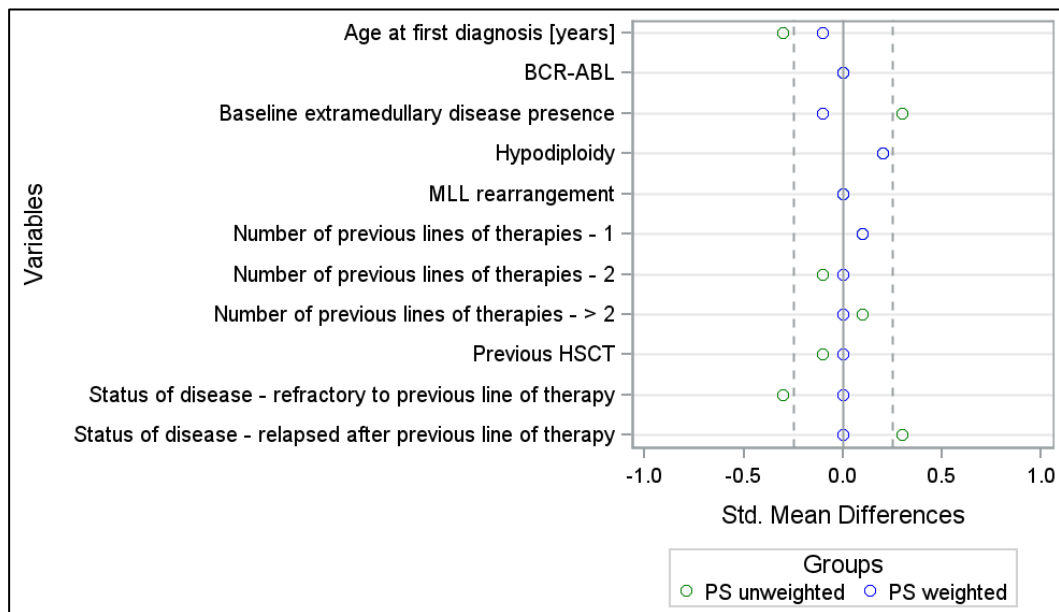

HSCT: Hematopoietic stem cell transplantation, ITT: Intention to treat, MLL: Mixed lineage leukemia, PS: Propensity Score

Note: Using a threshold of ISMDI  $\leq 0.25$  to identify imbalance in the calculated standardized mean differences
